# Supplementary material for: Pilot Study on the Role of Circulating miRNAs for the Improvement of the Predictive Ability of the 2MACE Score in Patients with Atrial Fibrillation
Source: PubMed Central journal article supplement (PMC7698124; doi:10.3390/jcm9113645), 2020-11-12
Supplement: jcm-09-03645-s001.pdf [file jcm-09-03645-s001.pdf]

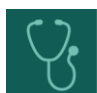

1 **Supplementary Table 1.** Pilot study cohort baseline clinical characteristics.

|                                                            | <b>Overall<br/>N = 19</b> | <b>Controls<br/>N = 10</b> | <b>Cases<br/>N = 9</b> | <b><i>p</i></b> |
|------------------------------------------------------------|---------------------------|----------------------------|------------------------|-----------------|
| <b>Demographic</b>                                         |                           |                            |                        |                 |
| Male sex, n (%)                                            | 6 (31.6)                  | 4 (40.0)                   | 2 (22.2)               | 0.405           |
| Age (years), median (IQR)                                  | 80 (74-83)                | 80 (74-84)                 | 80 (74-85)             | 1.000           |
| <b>Comorbidities, n (%)</b>                                |                           |                            |                        |                 |
| Hypertension                                               | 19 (100)                  | 10 (100)                   | 9 (100)                | 1.000           |
| Diabetes mellitus                                          | 4 (21.1)                  | 2 (20.0)                   | 2 (22.2)               | 0.906           |
| Heart failure                                              | 6 (31.6)                  | 3 (30.0)                   | 3 (33.3)               | 0.876           |
| History of stroke/TIA/thromboembolism                      | 5 (26.3)                  | 3 (30.0)                   | 2 (22.2)               | 0.701           |
| Renal impairment                                           | 2 (10.5)                  | 2 (20.0)                   | 0 (0.0)                | 0.156           |
| Coronary artery disease                                    | 1 (5.3)                   | 0 (0.0)                    | 1 (11.1)               | 0.279           |
| Hypercholesterolemia                                       | 1 (5.3)                   | 1 (10.0)                   | 0 (0.0)                | 0.330           |
| Current smoking habit                                      | 1 (5.3)                   | 1 (10.0)                   | 0 (0.0)                | 0.330           |
| Current alcohol consumption                                | 1 (5.3)                   | 1 (10.0)                   | 0 (0.0)                | 0.330           |
| History of previous bleeding                               | 1 (5.3)                   | 0 (0.0)                    | 1 (11.1)               | 0.279           |
| <b>Concomitant treatment, n (%)</b>                        |                           |                            |                        |                 |
| Amiodarone                                                 | 1 (5.3)                   | 0 (0.0)                    | 1 (11.1)               | 0.279           |
| Digoxin                                                    | 4 (21.1)                  | 2 (20.0)                   | 2 (22.2)               | 0.906           |
| Calcium antagonist                                         | 1 (5.3)                   | 1 (10.0)                   | 0 (0.0)                | 0.330           |
| Beta-blockers                                              | 8 (42.1)                  | 3 (30.0)                   | 5 (55.6)               | 0.260           |
| Statins                                                    | 2 (10.5)                  | 1 (10.0)                   | 1 (11.1)               | 0.937           |
| Diuretics                                                  | 10 (52.6)                 | 2 (20.0)                   | 8 (88.9)               | 0.003           |
| Antiplatelet therapy                                       | 3 (15.8)                  | 2 (20.0)                   | 1 (11.1)               | 0.596           |
| ACE inhibitors / ARBs                                      | 11 (57.9)                 | 4 (40.0)                   | 7 (77.8)               | 0.096           |
| TTR at 6 months of entry, n (%)                            | 83 (66-100)               | 83 (78-100)                | 75 (56-100)            | 0.549           |
| CHA <sub>2</sub> DS <sub>2</sub> -VASc score, median (IQR) | 5.0 (3.0-6.0)             | 4.5 (3.0-6.0)              | 5.0 (3.5-5.5)          | 0.968           |
| HAS-BLED score, median (IQR)                               | 2.0 (2.0-3.0)             | 2.5 (2.0-4.0)              | 2.0 (2.0-3.0)          | 0.720           |

ACE inhibitors = angiotensin-converting-enzyme inhibitors; ARBs = angiotensin II receptor blockers; IQR = interquartile range; TIA = transient ischemic attack; TTR = time in therapeutic range.

2

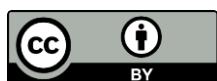

© 2020 by the authors. Submitted for possible open access publication under the terms and conditions of the Creative Commons Attribution (CC BY) license (<http://creativecommons.org/licenses/by/4.0/>).

3
